# Supplementary material for: Acoustic Emission Monitoring of High-Entropy Oxyfluoride Rock-Salt Cathodes during Battery Operation
Source: MDPI journal article supplement (doi:10.3390/coatings12030402), 2022-03-18
Supplement: s1 [file s1]

# Supplementary Materials: Acoustic Emission Monitoring of High-Entropy Oxyfluoride Rock-Salt Cathodes during Battery Operation

Simon Schweidler \*, Sören L. Dreyer, Ben Breitung and Torsten Brezesinski \*

Institute of Nanotechnology, Karlsruhe Institute of Technology (KIT), Hermann-von-Helmholtz-Platz 1, 76344 Eggenstein-Leopoldshafen, Germany; soeren.dreyer@kit.edu (S.L.D.); ben.breitung@kit.edu (B.B.)

\* Correspondence: simon.schweidler@kit.edu (S.S.); torsten.brezesinski@kit.edu (T.B.)

**Citation:** Schweidler, S.; Dreyer, S.L.; Breitung, B.; Brezesinski, T. Acoustic Emission Monitoring of High-Entropy Oxyfluoride Rock-Salt Cathodes during Battery Operation. *Coatings* **2022**, *12*, 402. <https://doi.org/10.3390/coatings12030402>

Academic Editor: Je Moon Yun

Received: 21 February 2022

Accepted: 16 March 2022

Published: 18 March 2022

**Publisher's Note:** MDPI stays neutral with regard to jurisdictional claims in published maps and institutional affiliations.

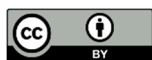

**Copyright:** © 2022 by the authors. Licensee MDPI, Basel, Switzerland. This article is an open access article distributed under the terms and conditions of the Creative Commons Attribution (CC BY) license (<https://creativecommons.org/licenses/by/4.0/>).

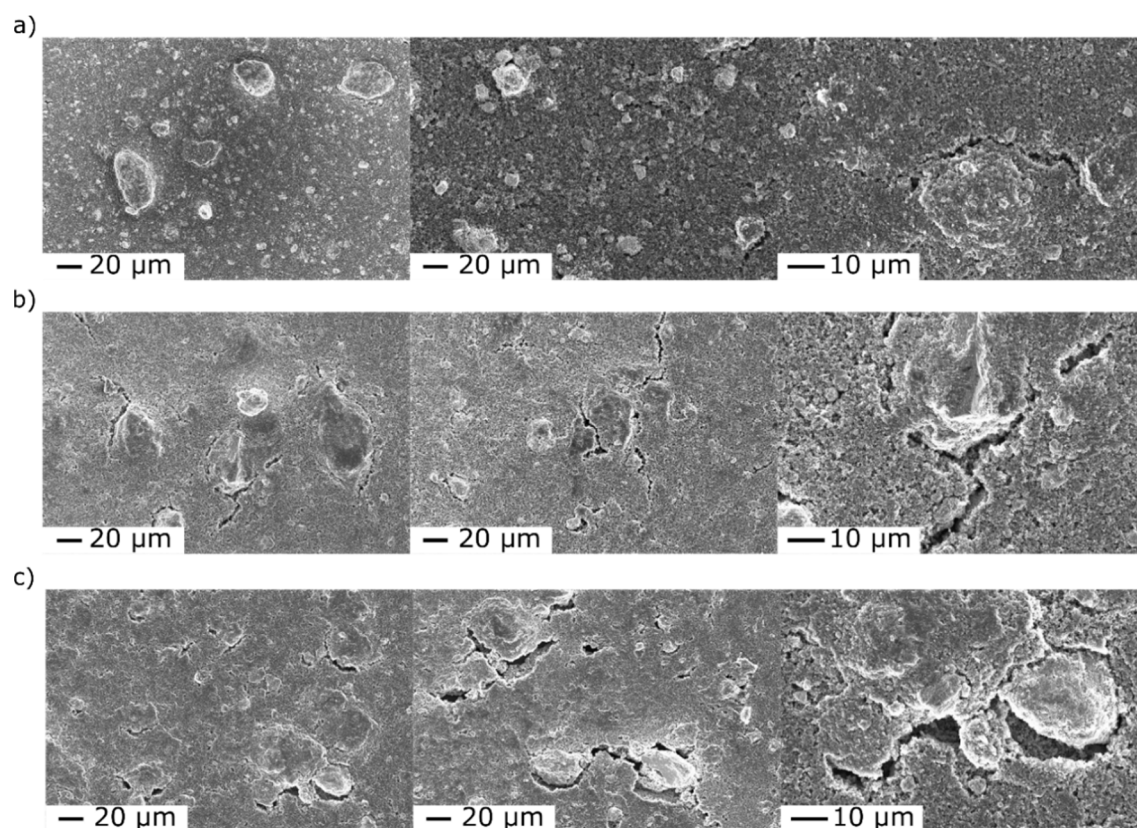

**Figure S1.** Top-view SEM images at different magnifications of the LiHEOF cathode charged to different cutoff voltages of a) 4.6 V, (b) 4.8 V and (c) 5.0 V vs Li<sup>+</sup>/Li in the fifth cycle.

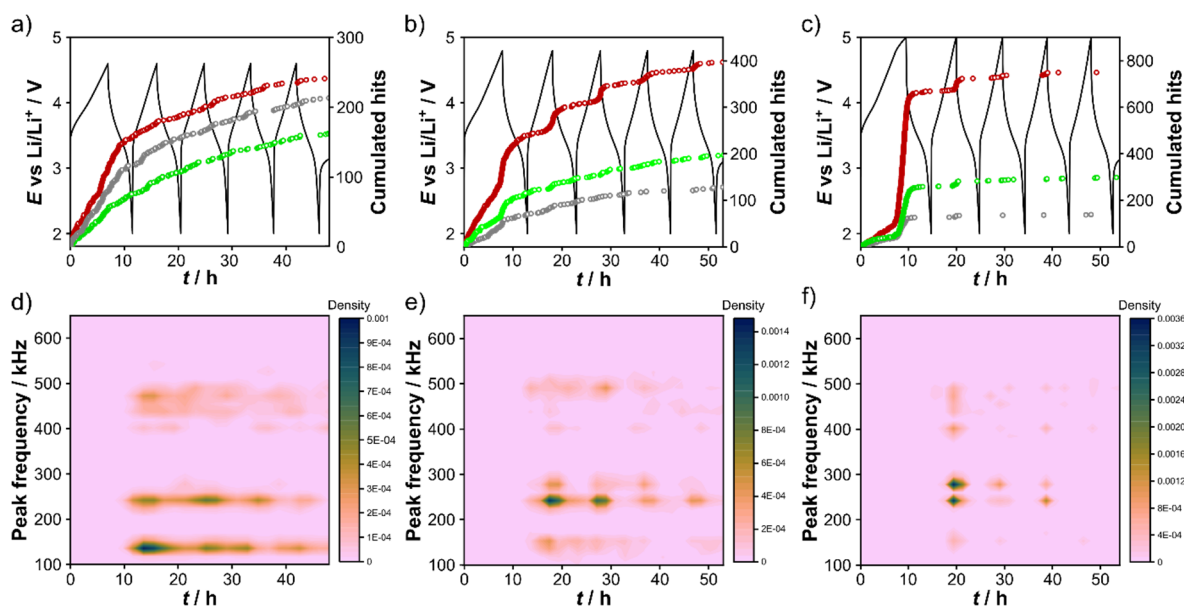

**Figure S2.** Voltage profile (black) of LiHEOF|Li cells cycled at 25 °C and C/10 rate between 2.0 V and either a) 4.6 V, b) 4.8 V or c) 5.0 V vs Li<sup>+</sup>/Li and corresponding cumulative AE hits for different peak frequency ranges (100-200 kHz in gray, 200-300 kHz in red, 300-600 kHz in green). d-f) Contour plots of hit density versus the time and peak frequency (from the second cycle onward). d) 2.0-4.6 V, e) 2.0-4.8 V and f) 2.0-5.0 V vs Li<sup>+</sup>/Li.

**Table S1.** Mean values of characteristic parameters for the AE 1 (100-200 kHz), AE 2 (200-300 kHz) and AE 3 (300-600 kHz) signals detected over the first five cycles in LiHEOF|Li cells cycled at C/10 rate and 25 °C in the voltage range of a) 2.0-4.6 V, b) 2.0-4.8 V and c) 2.0-5.0 V vs Li<sup>+</sup>/Li.

| a)                   |        |        |        |  |
|----------------------|--------|--------|--------|--|
| Parameter            | AE 1   | AE 2   | AE 3   |  |
| Rise time / $\mu$ s  | 8.09   | 6.69   | 3.85   |  |
| Duration / $\mu$ s   | 47.99  | 38.88  | 35.05  |  |
| Amplitude / dB       | 35.19  | 34.79  | 36.80  |  |
| Peak frequency / kHz | 137.76 | 244.02 | 454.70 |  |
| b)                   |        |        |        |  |
| Parameter            | AE 1   | AE 2   | AE 3   |  |
| Rise time / $\mu$ s  | 6.98   | 7.24   | 3.36   |  |
| Duration / $\mu$ s   | 35.47  | 38.08  | 32.09  |  |
| Amplitude / dB       | 35.19  | 36.72  | 38.78  |  |
| Peak frequency / kHz | 136.21 | 255.12 | 454.98 |  |
| c)                   |        |        |        |  |
| Parameter            | AE 1   | AE 2   | AE 3   |  |
| Rise time / $\mu$ s  | 8.28   | 5.56   | 3.67   |  |
| Duration / $\mu$ s   | 40.42  | 32.26  | 30.82  |  |
| Amplitude / dB       | 35.47  | 35.28  | 36.33  |  |
| Peak frequency / kHz | 141.71 | 252.58 | 456.23 |  |

**Table S2.** Proportion of cumulative hits for the AE 1 (100-200 kHz), AE 2 (200-300 kHz), and AE 3 (300-600 kHz) signals detected during the first charge cycle in LiHEOF|Li cells cycled at C/10 rate and 25 °C in the voltage range of a) 2.0-4.6 V, b) 2.0-4.8 V and c) 2.0-5.0 V vs Li<sup>+</sup>/Li.

| a)        |                 |           |  |
|-----------|-----------------|-----------|--|
| 2.0-4.6 V | Cumulative hits | Share / % |  |
| AE1       | 79              | 33        |  |
| AE2       | 110             | 45        |  |
| AE3       | 53              | 22        |  |
| b)        |                 |           |  |
| 2.0-4.8 V | Cumulative hits | Share / % |  |
| AE1       | 54              | 17        |  |
| AE2       | 175             | 56        |  |
| AE3       | 81              | 26        |  |
| c)        |                 |           |  |
| 2.0-5.0 V | Cumulative hits | Share / % |  |
| AE1       | 119             | 13        |  |
| AE2       | 578             | 64        |  |
| AE3       | 208             | 23        |  |
